# Supplementary material for: Removal of Zinc from Aqueous Solutions Using Lamellar Double Hydroxide Materials Impregnated with Cyanex 272: Characterization and Sorption Studies
Source: PubMed Central journal article supplement (PMC7143972; doi:10.3390/molecules25061263), 2020-03-11
Supplement: molecules-25-01263-s001.pdf [file molecules-25-01263-s001.pdf]

Supplementary materials:

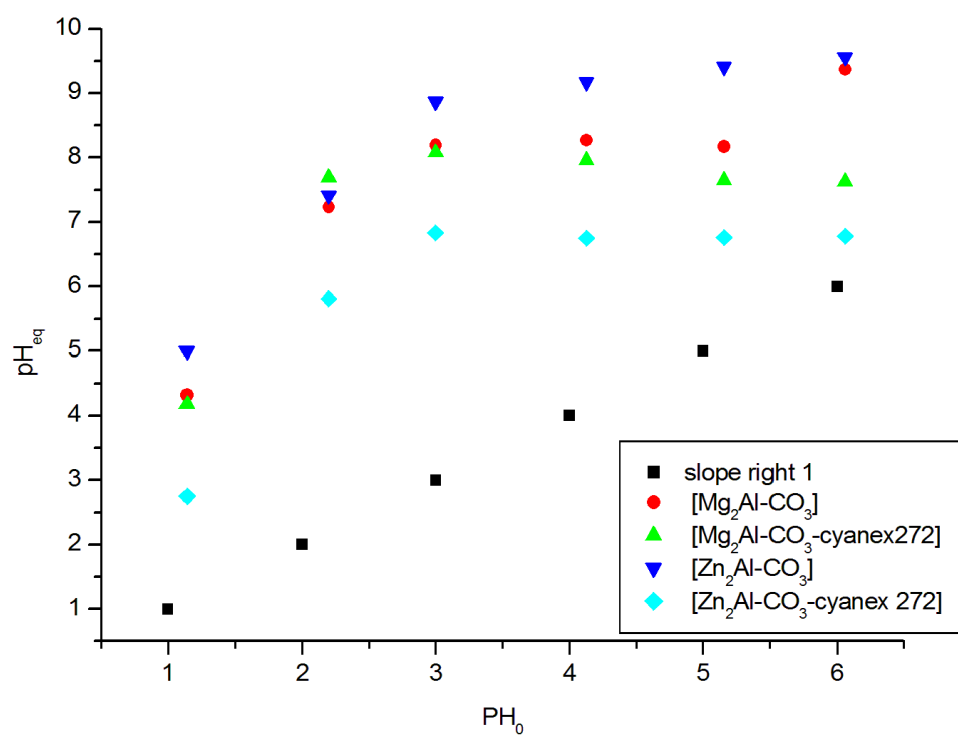

**Figure S1.** Variation in pH using the impregnated and non-impregnated LDH materials for zinc removal from aqueous solutions
